# Supplementary material for: GIST(消化管間質腫瘍)化学療法と看護のポイント (主なレジメン26の治療・看護スケジュール表つき 消化器がん化学療法看護のポイント) -- (レジメン別にわかるがん化学療法を受ける患者の看護のポイント)
Source: Royal Society of Chemistry journal article supplement (doi:10.1039/d3dt03901c), 2011-01-01
Supplement: d3dt03901c1.pdf [file d3dt03901c1.pdf]

## Supplementary Information

### Chemicals and handling

All chemicals were purchased and used as received. The solids (1,3-diamino-2-hydroxypropanole, 99 %, Acros Organics; 3-methoxysalicylaldehyde 99 %, Acros Organics; Europium(III) nitrate hexahydrate 99.9 %, Alfa Aesar; Zinc(III) nitrate hexahydrate 98 %, CentralChem) and solvents (ethanol 96 %; methanol p.a.) were used without any further purification. All manipulations were performed on air. The products were filtered over ashless paper.

### Synthesis of H<sub>3</sub>L

The Schiff base ligand (H<sub>3</sub>L) was prepared as reported elsewhere <sup>1,2</sup>.

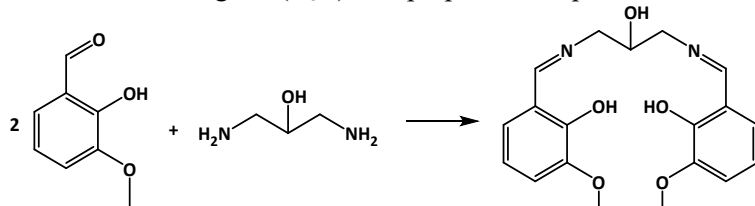

**Scheme 1.** Synthetic route for preparation of imine ligand H<sub>3</sub>L.

1. Rajnák, C.; Dolai, M.; Alii, M.; Titiš, J.; Boča, R., Slow magnetic relaxation in Cu(II)-Eu(III) and Cu(II)-La(III) complexes. *New. J. Chem.* 2019, 43, 12698–12701. <https://doi.org/10.1039/C9NJ02039J>.
2. Dolai, M.; Mistri, T.; Panja, A.; Alia, M., Diversity in supramolecular self-assembly through hydrogen-bonding interactions of non-coordinated aliphatic –OH group in a series of heterodinuclear CuIIIM (M = NaI, ZnII, HgII, SmIII, BiIII, PbII and CdII). *Inorg. Chim. Acta* 2013, 399, 95-104. <https://doi.org/10.1016/j.ica.2013.01.006>.

**Properties.**  $\theta_f = 115\text{--}120^\circ\text{C}$ . *Anal. Calc.* (%) for C<sub>19</sub>H<sub>22</sub>N<sub>2</sub>O<sub>5</sub> ( $M = 385.15\text{ g}\cdot\text{mol}^{-1}$ ): C, 63.86; H, 6.19; N, 7.82. Found: C, 63.19; H, 6.09; N, 7.83. **<sup>1</sup>H NMR** (600 MHz, DMSO-d<sub>6</sub>, 25 °C)  $\delta$  (ppm) 13.75 (bs, OH, 2H), 8.51 (s, –CH=N–, 2H), 7.02 (d,  $J = 7.9\text{ Hz}$ , H-4', H-6', 4H), 6.78 (t,  $J = 7.8\text{ Hz}$ , H-5', 2H), 5.25 (d,  $J = 4.7\text{ Hz}$ , OH, 1H), 4.04–3.98 (m, H-2, 1H), 3.78 (s, OCH<sub>3</sub>, 6H), 3.77 (ddd,  $J = 12.2, 4.4, 1.0\text{ Hz}$ , H-1, H-3, 2H), 3.60 (ddd,  $J = 12.3, 6.7, 0.7\text{ Hz}$ , H-1, H-3, 2H); **<sup>13</sup>C NMR** (150 MHz, DMSO-d<sub>6</sub>, 25 °C)  $\delta$  (ppm) 167.2 (–CH=N–), 152.3 (C-2'), 148.2 (C-3'), 123.2 (C-6'), 118.3 (C-1'), 117.4 (C-5'), 114.7 (C-4'), 69.3 (C-2), 62.0 (C-1, C-3), 55.7 (OCH<sub>3</sub>). **Selected IR bands** (cm<sup>-1</sup>): 3485(w), 3306(w), 3016(w), 2948(w), 2903(w), 2835(w), 1634(s) for  $\nu(\text{C}=\text{N})$ , 1521(m), 1471(s), 1456(sh), 1418(sh), 1371(w), 1334(sh), 1247(s), 1204(sh), 1168(w), 1120(m), 1077(s), 1051(m), 980(m), 950(m), 922(m), 834(m), 731(s), 605(m), 577(m), 513(m), 486(m). **UV-VIS** (EtOH)  $\nu_{\text{max}}/10^3\text{ cm}^{-1}$  (relat absorb.;  $\epsilon/\text{M}^{-1}\cdot\text{cm}^{-1}$ ) ( $c = 6.21\cdot 10^{-5}\text{ mol}\cdot\text{dm}^{-3}$ ): 23.98 (0.158; 2544), 30.21 (0.253; 40774), 33.88 (0.456; 7343), 37.92 (1.178; 18968), 45.01 (2.203; 35473).

### Synthesis of [(H<sub>2</sub>O)Zn<sup>II</sup>(LH)Eu<sup>III</sup>(NO<sub>3</sub>)<sub>3</sub>] (1)

A 25 cm<sup>3</sup> methanol solution of Zn(NO<sub>3</sub>)<sub>2</sub>·6H<sub>2</sub>O (0.297 g, 1.0 mmol) was added to a solution of H<sub>3</sub>L (0.358 g, 1.0 mmol) containing triethylamine (TEA) (0.275 cm<sup>3</sup>, 2.0 mmol) in methanol (30 cm<sup>3</sup>) at room temperature under constant stirring. The resulting mixture is stirred for 10 min, and then finely powdered europium nitrate Eu(NO<sub>3</sub>)<sub>3</sub>·6H<sub>2</sub>O (0.446 g, 1.0 mmol) was added. After being stirred for 1h, the mixture was filtered to remove the precipitate, if any. After a few days, yellow single crystals (needle-like), suitable for X-ray diffraction were precipitated out and collected by filtration.  $\theta_f = 247\text{--}250^\circ\text{C}$ . Yield: 0.557 g (72%). IR (cm<sup>-1</sup>): 1619 for  $\nu(\text{C}=\text{N})$ , 3134 for  $\nu(\text{alcoholic } -\text{OH})$ ;  $\nu(\text{nitrate})$  1449s, 1322s. *Anal. calcd.* (%) for C<sub>19</sub>H<sub>22</sub>EuN<sub>5</sub>O<sub>15</sub>Zn,  $M_r = 777.76$ : C 29.34, H 2.85, N 9.00. Found: C 29.68, H 3.68, N 9.17.

Magnetic Properties of the Europium(III) Complex – Possible Multiplet Crossover  
Romana Mičová, Zuzana Bielková, Cyril Rajnák, Ján Titiš, Ján Moncol', Alina Bienko, Roman Boča

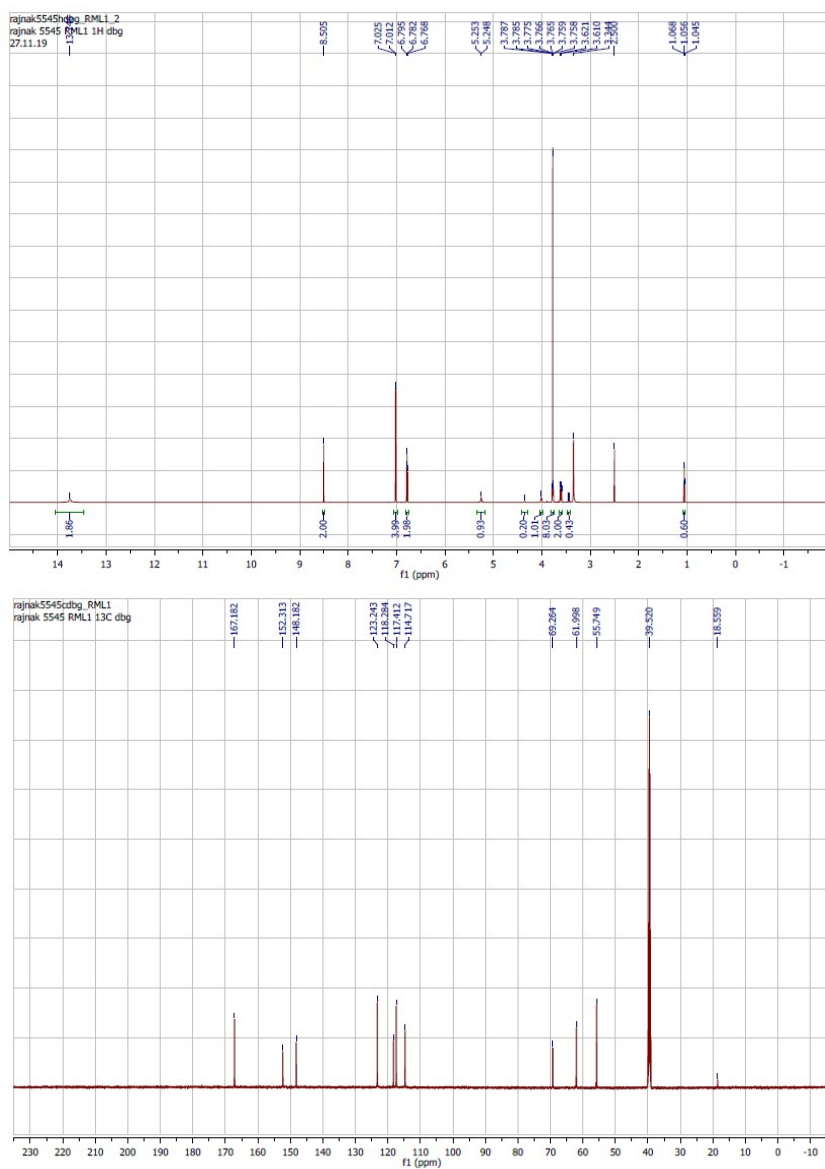

Figure S1. <sup>1</sup>H NMR spectrum of ligand H<sub>3</sub>L (top) and <sup>13</sup>C NMR spectrum (bottom).

**Table S1.** Crystal data and structure determination

|                                                       | [(H <sub>2</sub> O)Zn <sup>II</sup> (LH)Eu <sup>III</sup> (NO <sub>3</sub> ) <sub>3</sub> ] ( <b>1</b> ) |
|-------------------------------------------------------|----------------------------------------------------------------------------------------------------------|
| Empirical formula                                     | C <sub>19</sub> H <sub>22</sub> EuN <sub>5</sub> O <sub>15</sub> Zn                                      |
| Formula weight                                        | 777.74                                                                                                   |
| Temperature/K                                         | 100.0                                                                                                    |
| Crystal system                                        | monoclinic                                                                                               |
| Space group                                           | <i>P</i> 2 <sub>1</sub> / <i>c</i>                                                                       |
| <i>a</i> /Å                                           | 9.1308(6)                                                                                                |
| <i>b</i> /Å                                           | 28.357(3)                                                                                                |
| <i>c</i> /Å                                           | 10.3214(8)                                                                                               |
| $\alpha$ /°                                           | 90                                                                                                       |
| $\beta$ /°                                            | 105.792(6)                                                                                               |
| $\gamma$ /°                                           | 90                                                                                                       |
| Volume/Å <sup>3</sup>                                 | 2571.6(4)                                                                                                |
| <i>Z</i>                                              | 4                                                                                                        |
| $\rho_{\text{calc}}$ g/cm <sup>3</sup>                | 2.009                                                                                                    |
| $\mu$ /mm <sup>-1</sup>                               | 19.200                                                                                                   |
| <i>F</i> (000)                                        | 1536.0                                                                                                   |
| Crystal size/mm <sup>3</sup>                          | 0.28 × 0.03 × 0.01                                                                                       |
| Radiation                                             | CuK $\alpha$ ( $\lambda$ = 1.54186)                                                                      |
| 2 $\Theta$ range for data collection/°                | 9.436 to 133.206                                                                                         |
| Index ranges                                          | -10 ≤ <i>h</i> ≤ 10, -33 ≤ <i>k</i> ≤ 31, -5 ≤ <i>l</i> ≤ 12                                             |
| Reflections collected                                 | 16856                                                                                                    |
| Independent reflections                               | 4284 [Rint = 0.07171, Rsigma = 0.04544]                                                                  |
| Data/restraints/parameters                            | 4284/68/387                                                                                              |
| Goodness-of-fit on <i>F</i> <sup>2</sup>              | 1.068                                                                                                    |
| Final R indexes [ <i>I</i> ≥ 2 $\sigma$ ( <i>I</i> )] | R1 = 0.0915, wR2 = 0.2616                                                                                |
| Final R indexes [all data]                            | R1 = 0.1044, wR2 = 0.2735                                                                                |

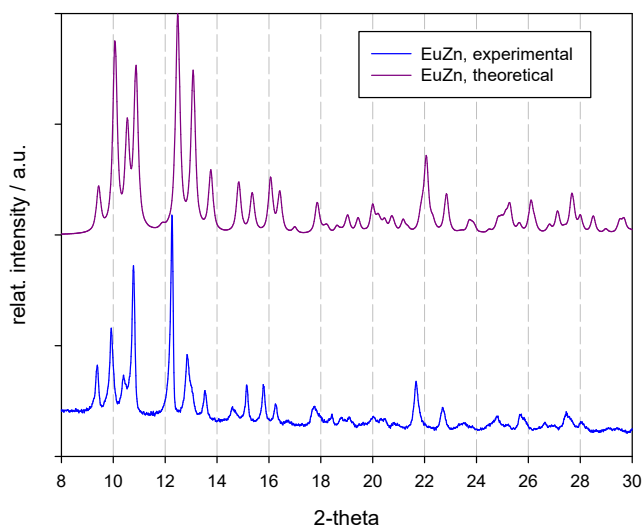

**Figure S2.** Calculated powder diffraction pattern for **1** from cif file (up) and recorded pattern using  $\lambda$  = 1.54060 Å (down).

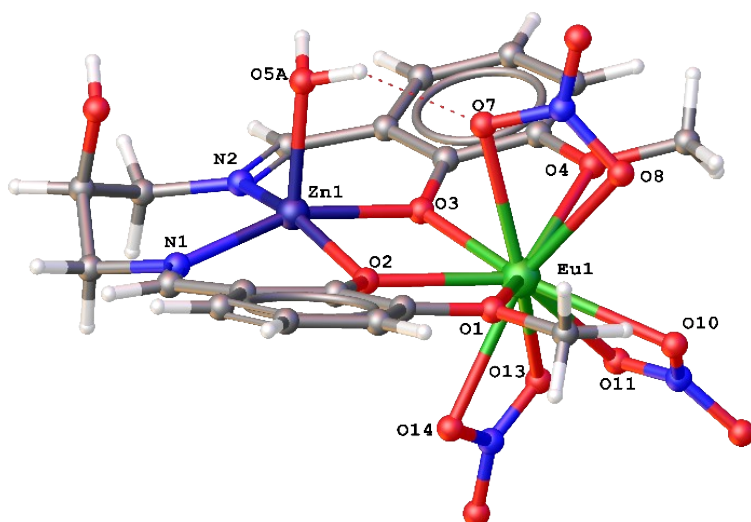

**Figure S3.** Molecular structure of **1** with atom labeling.

**Table S2.** Bond lengths (Å) and bond angles (deg) within the coordination polyhedra of **1**.

|             |           |             |           |             |           |
|-------------|-----------|-------------|-----------|-------------|-----------|
| Eu1-O3      | 2.333(8)  | Eu1-O9      | 2.503(10) | Zn1-O3      | 2.062(10) |
| Eu1-O2      | 2.336(9)  | Eu1-O10     | 2.470(11) | Zn1-O2      | 2.016(9)  |
| Eu1-O4      | 2.515(9)  | Eu1-O7      | 2.515(17) | Zn1-O5      | 2.067(13) |
| Eu1-O1      | 2.526(8)  | Eu1-O8      | 2.499(14) | Zn1-N2      | 2.058(11) |
| Eu1-O15     | 2.509(17) | Eu1-O7A     | 2.53(2)   | Zn1-N1      | 2.050(12) |
| Eu1-O14     | 2.672(14) | Eu1-O8A     | 2.52(2)   |             |           |
| O1-Eu1-O4   | 146.0(3)  | O2-Eu1-O4   | 127.4(3)  | O4-Eu1-O7A  | 86.3(4)   |
| O2-Eu1-O3   | 64.8(3)   | O1-Eu1-O2   | 65.4(3)   | O4-Eu1-O8A  | 72.7(6)   |
| O1-Eu1-O3   | 125.9(3)  | O2-Eu1-O15  | 150.8(4)  | O1-Eu1-O7A  | 100.6(6)  |
| O1-Eu1-O14  | 66.3(4)   | O2-Eu1-O14  | 125.2(4)  | O4-Eu1-O15  | 71.0(3)   |
| O3-Eu1-O15  | 119.9(4)  | O2-Eu1-O9   | 75.4(3)   | O1-Eu1-O15  | 113.8(3)  |
| O3-Eu1-O14  | 167.6(4)  | O2-Eu1-O10  | 119.6(4)  | O7A-Eu1-O15 | 86.1(7)   |
| O3-Eu1-O9   | 73.1(3)   | O2-Eu1-O7   | 87.5(4)   | O8A-Eu1-O15 | 46.8(6)   |
| O3-Eu1-O10  | 113.0(3)  | O2-Eu1-O8   | 78.3(4)   | O4-Eu1-O9   | 78.5(3)   |
| O3-Eu1-O7   | 69.3(4)   | O2-Eu1-O7A  | 66.3(6)   | O1-Eu1-O9   | 75.2(3)   |
| O3-Eu1-O8   | 109.6(4)  | O2-Eu1-O8A  | 111.9(6)  | O9-Eu1-O15  | 133.6(4)  |
| O3-Eu1-O7A  | 77.6(7)   | O4-Eu1-O14  | 107.2(3)  | O9-Eu1-O14  | 115.0(4)  |
| O3-Eu1-O8A  | 82.0(7)   | O4-Eu1-O7   | 86.3(4)   | O7-Eu1-O9   | 142.4(4)  |
| O14-Eu1-O15 | 47.7(4)   | O7-Eu1-O15  | 70.0(5)   | O7A-Eu1-O9  | 139.0(7)  |
| O8A-Eu1-O9  | 148.1(7)  | O4-Eu1-O10  | 71.2(3)   | O1-Eu1-O10  | 75.5(3)   |
| O10-Eu1-O15 | 86.3(4)   | O10-Eu1-O14 | 69.9(4)   | O9-Eu1-O10  | 50.5(3)   |
| O7-Eu1-O10  | 151.7(5)  | O8-Eu1-O10  | 137.3(4)  | O7A-Eu1-O10 | 169.1(7)  |
| O8A-Eu1-O10 | 128.0(6)  | O1-Eu1-O7   | 127.5(4)  | O7-Eu1-O14  | 102.2(4)  |
| O4-Eu1-O8   | 131.3(4)  | O1-Eu1-O8   | 79.3(4)   | O8-Eu1-O15  | 73.1(4)   |
| O8-Eu1-O14  | 68.6(4)   | O8-Eu1-O9   | 149.1(4)  | O7-Eu1-O8   | 50.5(4)   |
| O7A-Eu1-O14 | 99.2(7)   | O1-Eu1-O8A  | 136.6(6)  | O8A-Eu1-O14 | 86.9(7)   |
| O3-Zn1-Eu1  | 38.1(2)   | O2-Zn1-Eu1  | 37.8(3)   | O5-Zn1-Eu1  | 97.0(4)   |
| N2-Zn1-Eu1  | 124.7(3)  | N1-Zn1-Eu1  | 126.1(3)  | Zn1-O3-Eu1  | 108.8(4)  |
| Zn1-O2-Eu1  | 110.3(4)  | O2-Zn1-O3   | 75.7(4)   | O2-Zn1-O5   | 96.6(5)   |
| O2-Zn1-N2   | 154.4(4)  | O2-Zn1-N1   | 89.4(4)   | N2-Zn1-O3   | 88.0(4)   |
| N2-Zn1-O5   | 105.5(5)  | N1-Zn1-O3   | 157.4(4)  | N1-Zn1-O5   | 99.4(5)   |
| N1-Zn1-N2   | 99.4(5)   |             |           |             |           |

**Table S3.** SHAPE analysis of the coordination polyhedra

| Central atom | Coord. number | Chromophore                        | Agreement index | Geometry |
|--------------|---------------|------------------------------------|-----------------|----------|
| Zn           | 5             | {ZnO <sub>3</sub> N <sub>2</sub> } | 1.253           | 4py      |
| Eu           | 10            | {EuO <sub>9</sub> }                | 4.271           | bc4a     |

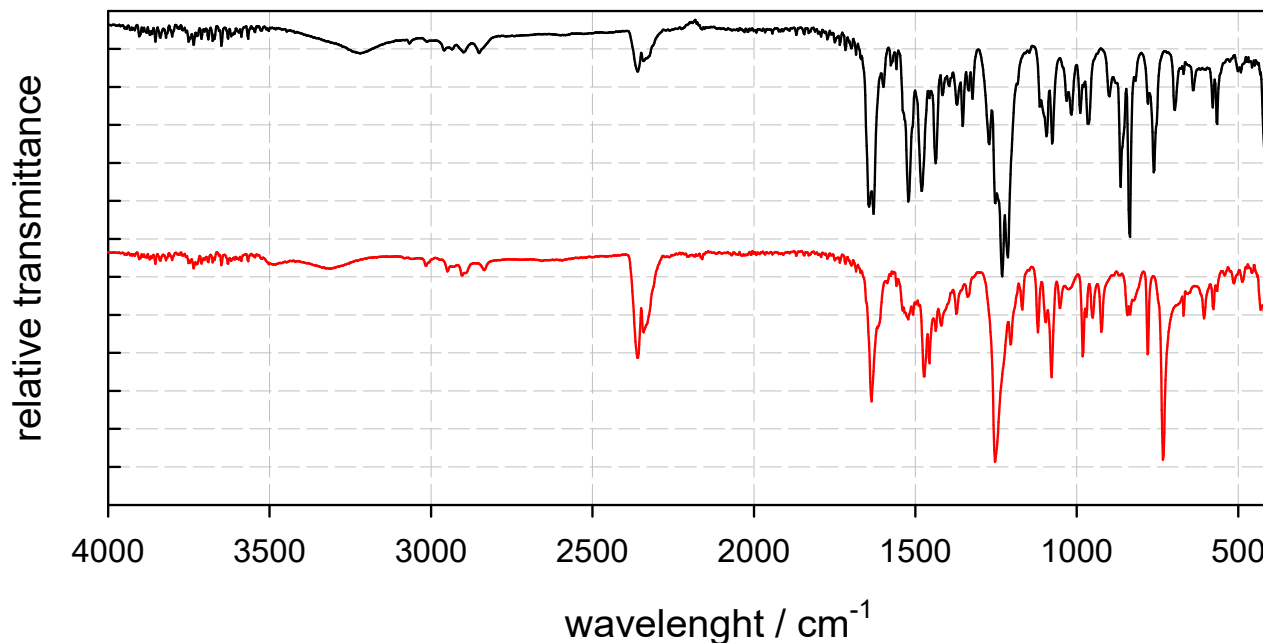

**Figure S4.** FT-IR (ATR) spectrum of H<sub>3</sub>L (red, bottom) and **1** (black, top).

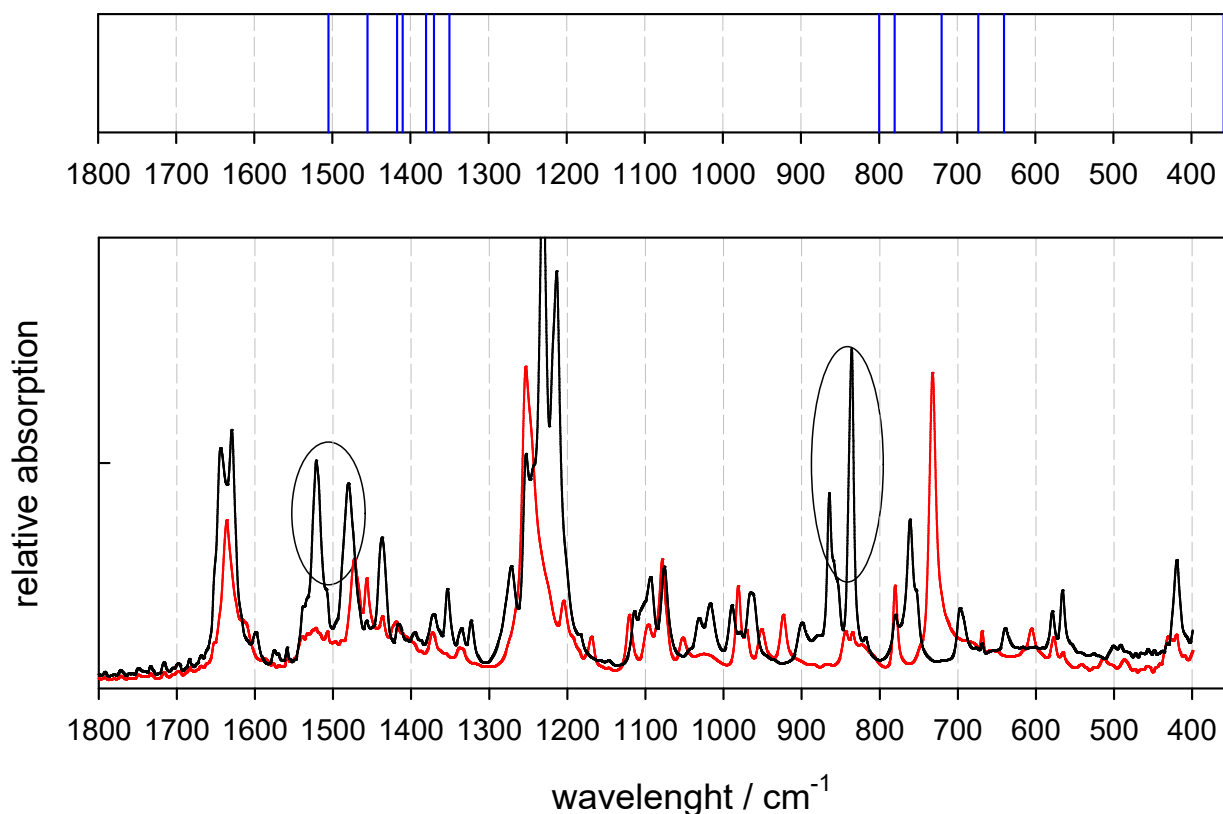

**Figure S5.** Low-frequency IR spectrum of H<sub>3</sub>L (red) and **1** (black) in the absorbance mode along with calculated transitions (vertical bars). Additional peaks at ca 850 and 1500 cm<sup>-1</sup> might correspond to the direct <sup>7</sup>F<sub>0</sub> → <sup>7</sup>F<sub>2</sub> and <sup>7</sup>F<sub>0</sub> → <sup>7</sup>F<sub>3</sub> transitions.

Magnetic Properties of the Europium(III) Complex – Possible Multiplet Crossover  
 Romana Mičová, Zuzana Bielková, Cyril Rajnák, Ján Titiš, Ján Moncol', Alina Bienko, Roman Boča

**Table S4.** SOC corrected absorption spectrum (SA-CASSCF+SOMF).

| States                                                    | Energy<br>(cm <sup>-1</sup> ) | Wavelength<br>(nm) | fosc        | T2<br>(D**2) | TX <br>(D) | TY <br>(D) | TZ <br>(D) |
|-----------------------------------------------------------|-------------------------------|--------------------|-------------|--------------|------------|------------|------------|
| <sup>7</sup> F <sub>0</sub> → <sup>7</sup> F <sub>1</sub> |                               |                    |             |              |            |            |            |
| 0 1                                                       | 132.1                         | 75676.8            | 0.000000000 | 0.00000      | 0.00001    | 0.00001    | 0.00000    |
| 0 2                                                       | 248.7                         | 40202.5            | 0.000000000 | 0.00000      | 0.00003    | 0.00006    | 0.00002    |
| 0 3                                                       | 359.2                         | 27839.7            | 0.000000000 | 0.00000      | 0.00009    | 0.00008    | 0.00019    |
| <sup>7</sup> F <sub>0</sub> → <sup>7</sup> F <sub>2</sub> |                               |                    |             |              |            |            |            |
| 0 4                                                       | 641.8                         | 15581.6            | 0.000000000 | 0.00000      | 0.00045    | 0.00023    | 0.00119    |
| 0 5                                                       | 673.0                         | 14858.6            | 0.000000001 | 0.00000      | 0.00097    | 0.00092    | 0.00175    |
| 0 6                                                       | 718.9                         | 13909.5            | 0.000000000 | 0.00000      | 0.00024    | 0.00075    | 0.00062    |
| 0 7                                                       | 780.8                         | 12808.1            | 0.000000000 | 0.00000      | 0.00059    | 0.00029    | 0.00100    |
| 0 8                                                       | 798.1                         | 12530.4            | 0.000000001 | 0.00001      | 0.00110    | 0.00248    | 0.00076    |
| <sup>7</sup> F <sub>0</sub> → <sup>7</sup> F <sub>3</sub> |                               |                    |             |              |            |            |            |
| 0 9                                                       | 1357.7                        | 7365.6             | 0.000000000 | 0.00000      | 0.00022    | 0.00044    | 0.00002    |
| 0 10                                                      | 1370.2                        | 7298.3             | 0.000000000 | 0.00000      | 0.00004    | 0.00009    | 0.00018    |
| 0 11                                                      | 1386.6                        | 7211.7             | 0.000000000 | 0.00000      | 0.00032    | 0.00008    | 0.00022    |
| 0 12                                                      | 1411.0                        | 7087.3             | 0.000000000 | 0.00000      | 0.00006    | 0.00046    | 0.00018    |
| 0 13                                                      | 1417.5                        | 7054.5             | 0.000000000 | 0.00000      | 0.00003    | 0.00015    | 0.00021    |
| 0 14                                                      | 1455.9                        | 6868.7             | 0.000000000 | 0.00000      | 0.00040    | 0.00080    | 0.00043    |
| 0 15                                                      | 1503.9                        | 6649.5             | 0.000000000 | 0.00000      | 0.00013    | 0.00006    | 0.00001    |

Magnetic Properties of the Europium(III) Complex – Possible Multiplet Crossover  
 Romana Mičová, Zuzana Bieliková, Cyril Rajnák, Ján Titiš, Ján Moncol', Alina Bienko, Roman Boča

**Table S5.** *Ab initio* (SA-CASSCF+SOMF) calculated energies of the multiplets  ${}^7F_0$  through  ${}^7F_6$

| Eigenvalues    | cm <sup>-1</sup> | eV     | Boltzmann populations at $T = 300K$ |
|----------------|------------------|--------|-------------------------------------|
| 7F0 0:         | 0.00             | 0.0000 | 4.58e-01                            |
| 3 multiplets   |                  |        |                                     |
| 7F1 1:         | 132.14           | 0.0164 | 2.43e-01                            |
| 7F1 2:         | 248.74           | 0.0308 | 1.39e-01                            |
| 7F1 3:         | 359.20           | 0.0445 | 8.18e-02                            |
| 5 multiplets   |                  |        |                                     |
| 7F2 4:         | 641.78           | 0.0796 | 2.11e-02                            |
| 7F2 5:         | 673.01           | 0.0834 | 1.82e-02                            |
| 7F2 6:         | 718.93           | 0.0891 | 1.46e-02                            |
| 7F2 7:         | 780.76           | 0.0968 | 1.08e-02                            |
| 7F2 8:         | 798.06           | 0.0989 | 9.97e-03                            |
| 7 multiplets   |                  |        |                                     |
| 7F3 9:         | 1357.67          | 0.1683 | 6.81e-04                            |
| 7F3 10:        | 1370.19          | 0.1699 | 6.41e-04                            |
| 7F3 11:        | 1386.63          | 0.1719 | 5.92e-04                            |
| 7F3 12:        | 1410.97          | 0.1749 | 5.27e-04                            |
| 7F3 13:        | 1417.53          | 0.1758 | 5.11e-04                            |
| 7F3 14:        | 1455.88          | 0.1805 | 4.25e-04                            |
| 7F3 15:        | 1503.87          | 0.1865 | 3.38e-04                            |
| 9 multiplets   |                  |        |                                     |
| 7F4 16:        | 2202.98          | 0.2731 | 1.18e-05                            |
| 7F4 17:        | 2235.50          | 0.2772 | 1.01e-05                            |
| 7F4 18:        | 2253.42          | 0.2794 | 9.27e-06                            |
| 7F4 19:        | 2310.15          | 0.2864 | 7.07e-06                            |
| 7F4 20:        | 2398.58          | 0.2974 | 4.62e-06                            |
| 7F4 21:        | 2402.68          | 0.2979 | 4.53e-06                            |
| 7F4 22:        | 2421.20          | 0.3002 | 4.15e-06                            |
| 7F4 23:        | 2465.42          | 0.3057 | 3.36e-06                            |
| 7F4 24:        | 2473.86          | 0.3067 | 3.22e-06                            |
| 11 multiplets  |                  |        |                                     |
| 7F5 25:        | 3365.82          | 0.4173 | 4.47e-08                            |
| 7F5 26:        | 3393.84          | 0.4208 | 3.91e-08                            |
| 7F5 27:        | 3454.47          | 0.4283 | 2.92e-08                            |
| 7F5 28:        | 3455.47          | 0.4284 | 2.91e-08                            |
| 7F5 29:        | 3497.61          | 0.4336 | 2.38e-08                            |
| 7F5 30:        | 3539.04          | 0.4388 | 1.95e-08                            |
| 7F5 31:        | 3555.71          | 0.4409 | 1.80e-08                            |
| 7F5 32:        | 3597.49          | 0.4460 | 1.47e-08                            |
| 7F5 33:        | 3612.52          | 0.4479 | 1.37e-08                            |
| 7F5 34:        | 3640.59          | 0.4514 | 1.20e-08                            |
| 7F5 35:        | 3648.62          | 0.4524 | 1.15e-08                            |
| 13 multiplets: |                  |        |                                     |
| 7F6 36:        | 4716.89          | 0.5848 | 6.86e-11                            |
| 7F6 37:        | 4717.52          | 0.5849 | 6.84e-11                            |
| 7F6 38:        | 4805.13          | 0.5958 | 4.49e-11                            |
| 7F6 39:        | 4814.84          | 0.5970 | 4.29e-11                            |
| 7F6 40:        | 4851.99          | 0.6016 | 3.59e-11                            |
| 7F6 41:        | 4887.77          | 0.6060 | 3.02e-11                            |
| 7F6 42:        | 4903.82          | 0.6080 | 2.80e-11                            |
| 7F6 43:        | 4956.08          | 0.6145 | 2.18e-11                            |
| 7F6 44:        | 4959.67          | 0.6149 | 2.14e-11                            |
| 7F6 45:        | 5020.28          | 0.6224 | 1.60e-11                            |
| 7F6 46:        | 5021.41          | 0.6226 | 1.59e-11                            |
| 7F6 47:        | 5101.35          | 0.6325 | 1.09e-11                            |
| 7F6 48:        | 5101.52          | 0.6325 | 1.08e-11                            |

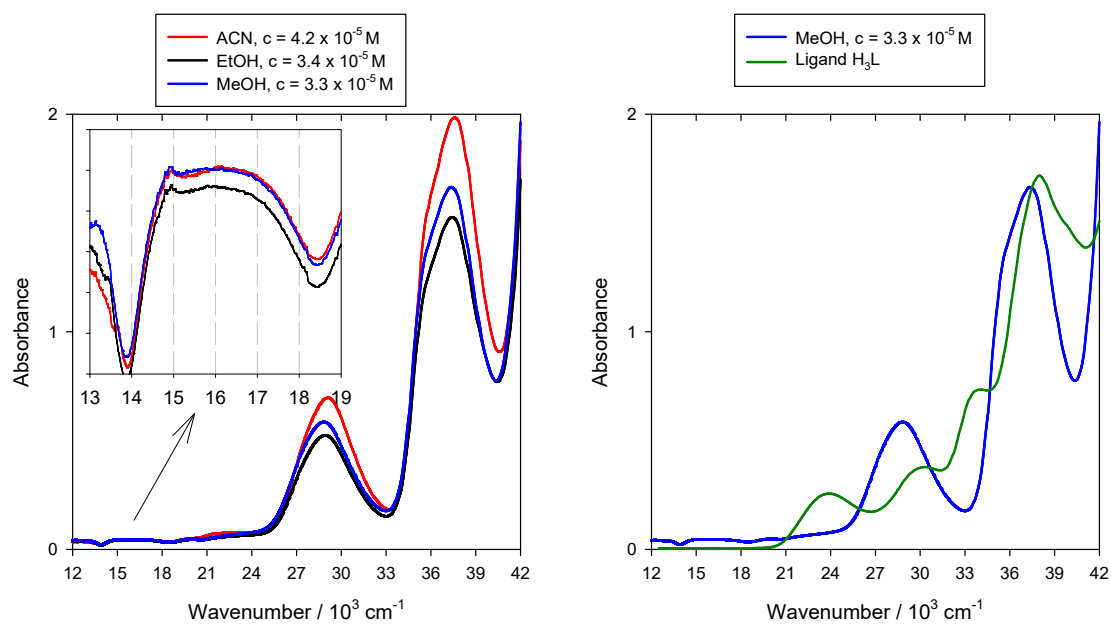

**Figure S6.** Electronic UV/Vis spectra of **1** in various solvents.



### DC magnetization

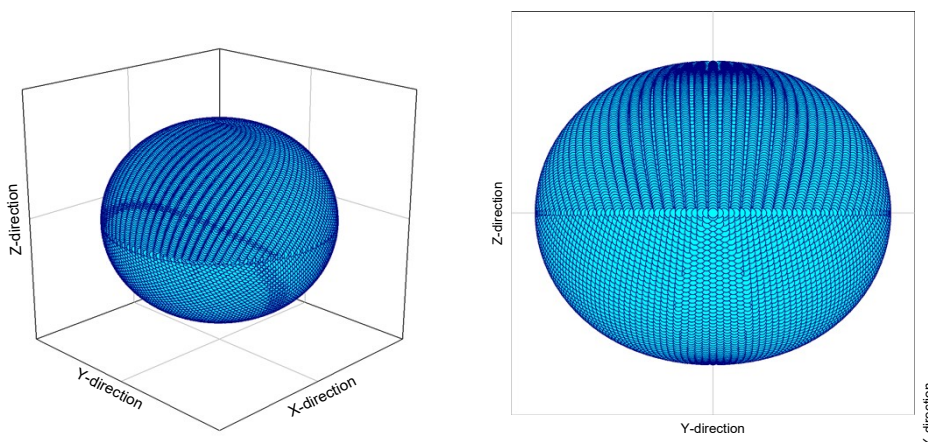

**Figure S7.** 3D view of the magnetization at  $T = 2.0$  K and  $B = 1.0$  T calculated from the fitted magnetic parameters for **1** (see main text). Result – slight easy plane ( $z$ -compression).

### AC susceptibility data

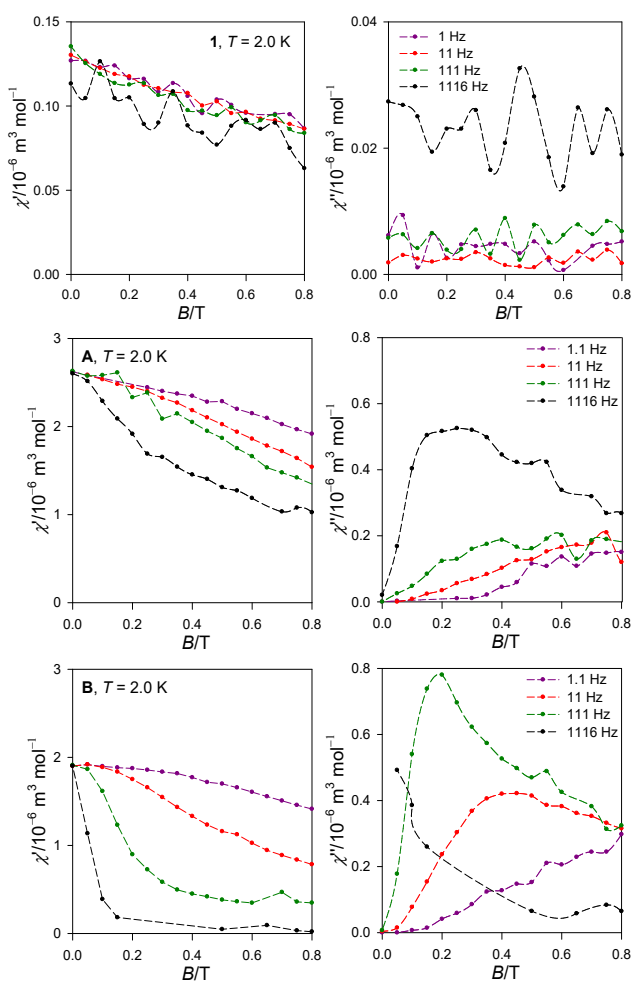

**Figure S8.** AC susceptibility data for  $[(\text{H}_2\text{O})\text{Zn}^{\text{II}}(\text{LH})\text{Eu}^{\text{III}}(\text{NO}_3)_3]$  (**1**)  $[(\text{H}_2\text{O})\text{Cu}^{\text{II}}(\text{LH})\text{Eu}^{\text{III}}(\text{NO}_3)_3]$  (**A**) and  $[(\text{H}_2\text{O})\text{Cu}^{\text{II}}(\text{LH})\text{La}^{\text{III}}(\text{NO}_3)_3]$  (**B**). Note: the AC response for **1** is ca 20-times lower relative to **A** and close to the detection limit of the MPMS apparatus (magnetic moment  $m'' \sim 10^{-8} - 10^{-7}$  emu).

### *A multiplet crossover*

In interpreting the experimental susceptibility data an alternate view has been applied – a two level model. Basically, it has roots in theory of the spin crossover that is well elaborated. The ground levels (low in energy, L) is diamagnetic ( $J_L = 0$ ), however possessing some temperature independent paramagnetism originating in the admixture of the excited magnetic state via spin-orbit interaction. This works like the van Vleck term  $\alpha_L$ . The excited level (high in energy, H) is magnetic ( $J_H = 1$ ) and obeying the Curie law with  $g_H$

$$\chi = (1 - x_H)\alpha_L + x_H \frac{N_A \mu_0 \mu_B^2}{3k_B T} g_H^2 J_H (J_H + 1)$$

The separation between them is  $\Delta_0$ . Then the regular solution model of the spin crossover, equivalent to the two-level Ising-like model,<sup>20</sup> offers an expression for the mole fraction of the high-energy state  $0 < x_H < 1$  in the form

$$x_H = (1 + \sigma) / 2$$

obeying the implicit equation

$$\sigma = \frac{r_{\text{eff}} \exp[-(\Delta_0 - 2\gamma\sigma) / k_B T] - 1}{r_{\text{eff}} \exp[-(\Delta_0 - 2\gamma\sigma) / k_B T] + 1}$$

where the effective degeneracy ratio involves the electronic and vibrational parts and  $r_{\text{eff}} > 3$  is required for  $J_H = 1$ . Then the entropy and enthalpy of the transition are  $\Delta S = R \ln r_{\text{eff}}$  and  $\Delta H = N_A \Delta_0$ , respectively. The susceptibility data was fitted with the above model yielding  $\alpha_L = 72(1) \times 10^{-9} \text{ m}^3 \text{ mol}^{-1}$ ,  $g_H = 1.40(20)$ ,  $\Delta_0 = 503(40) \text{ K} = 350 \text{ cm}^{-1}$ , and  $r_{\text{eff}} = 3$  was fixed (the solid-state cooperativeness  $\gamma$  was omitted). The quality of the fit is perfect (Figure 3 in the main text). Notice,  $g_H$  is close to the theoretical prediction  $g_H = 1.5$  for Eu(III) and independently fitted  $\Delta_0$  is close to  $\lambda(\text{Eu})$ . Derived thermodynamic parameters of the „multiplet crossover“ are  $\Delta H = 4.19 \text{ kJ mol}^{-1}$  and  $\Delta S = 9.13 \text{ J K}^{-1} \text{ mol}^{-1}$ . The transition temperature of the entropy driven process, when  $x_H = 0.5$ , is  $T_{1/2} = \Delta H / \Delta S = 458 \text{ K}$ , and the equilibrium constant is  $K = x_H / (1 - x_H)$ .

(20) Boča, R.; Linert, W. Is There a Need for New Models of the Spin Crossover? *Monatsh. Chem.* **2003**, *134*, 199–216. DOI 10.1007/s00706-002-0489-4.
